# Supplementary material for: Identification and validation of SUN modification-related anti-PD-1 immunotherapy-resistance signatures to predict prognosis and immune microenvironment status in glioblastoma
Source: Research Square preprint supplement (doi:10.21203/rs.3.rs-6838293/v1), 2025-06-13

**Figure S1 Machine learning results.**


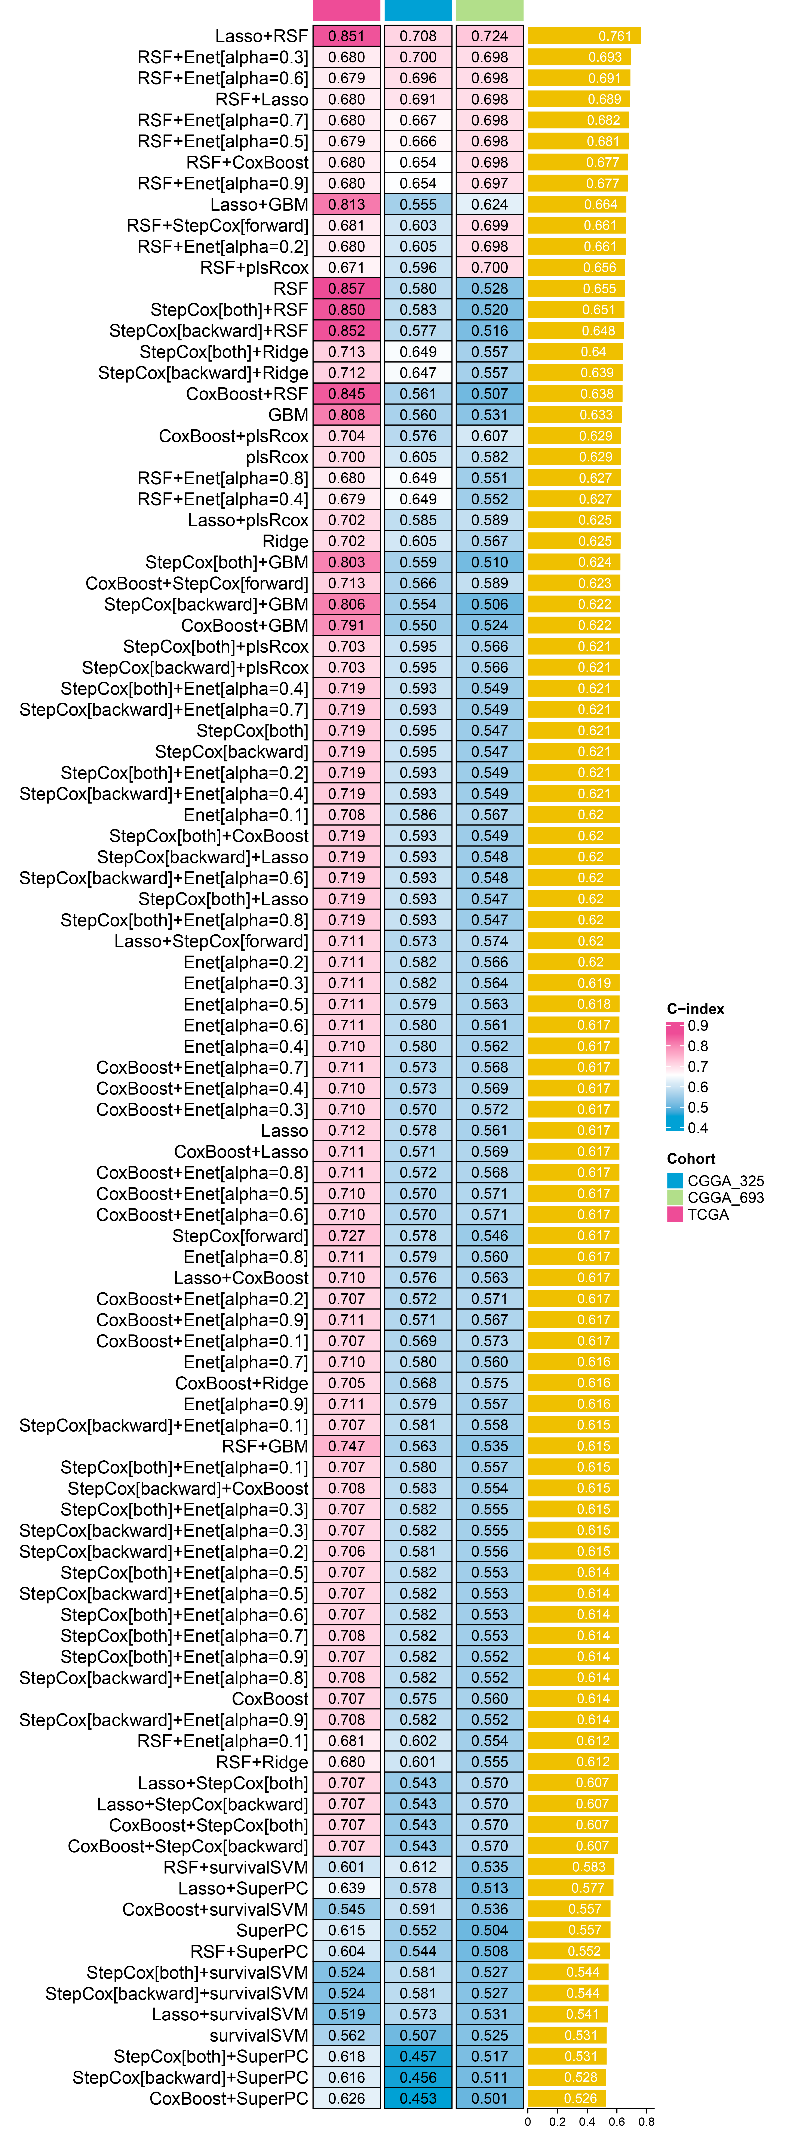


**Figure S2 The mutation patterns in high- and low risk groups.** (A) The mutation patterns in high-risk group. (B) The mutation patterns in low-risk group.


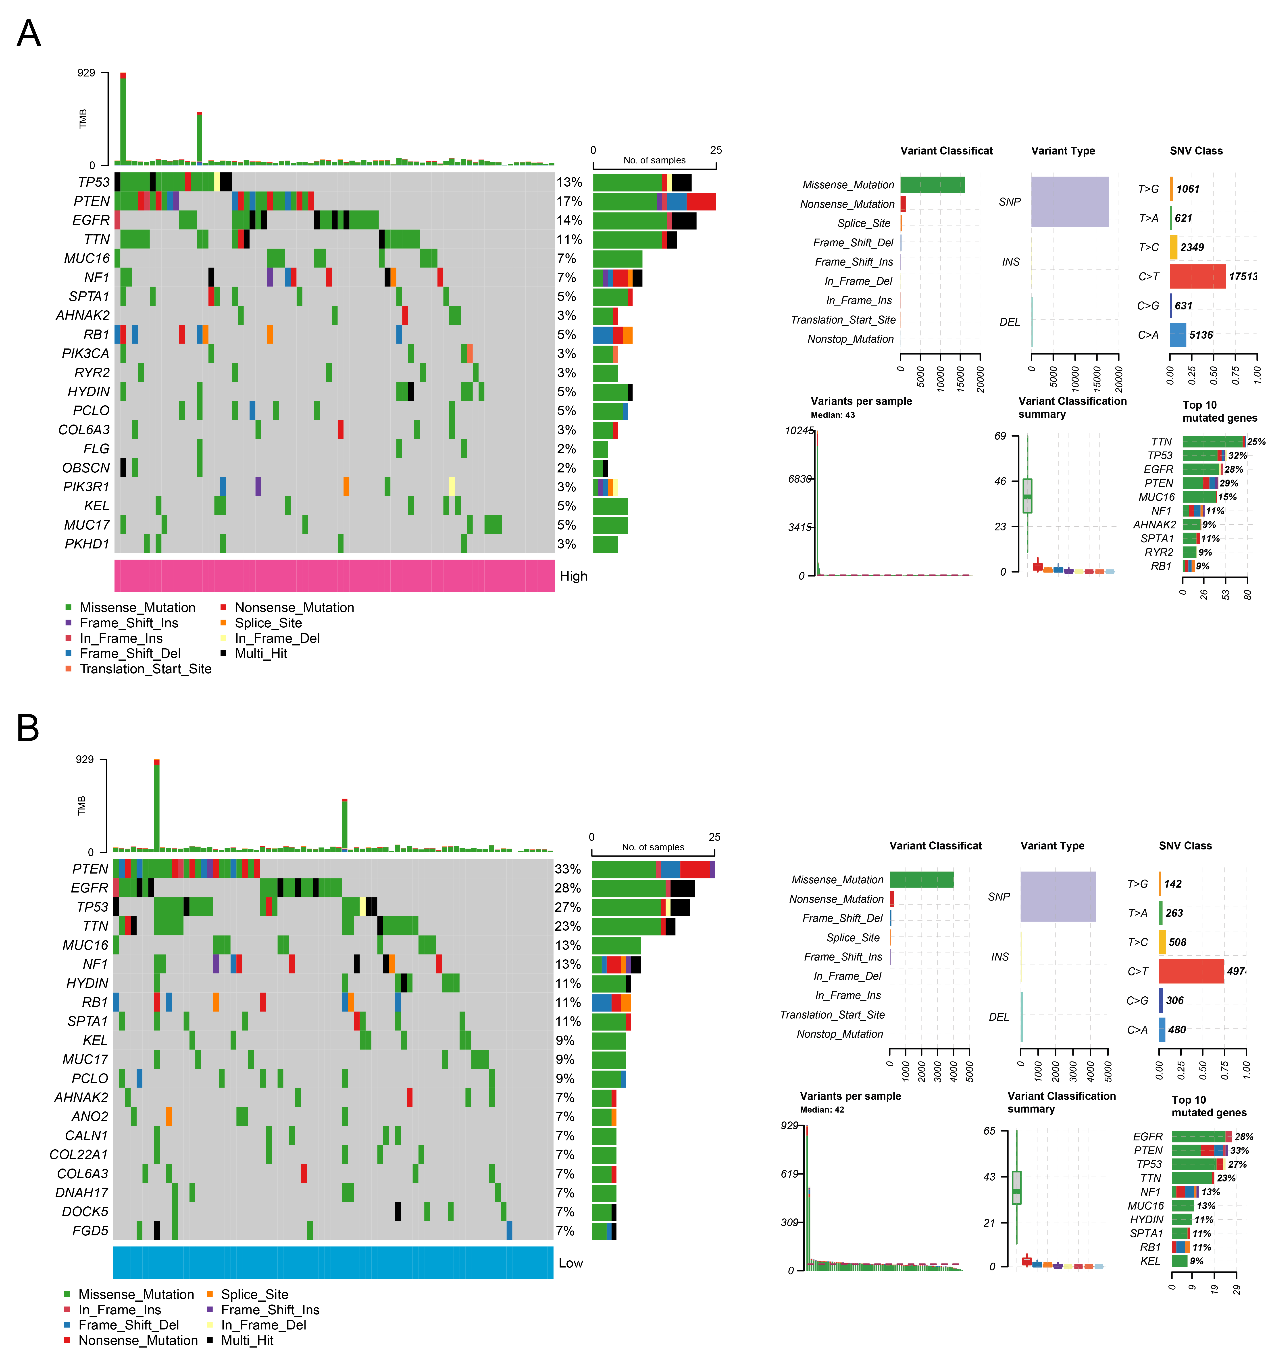

Supplement: Supplementary file 1 [file 2c4511ab788301bad9b1fd95.docx]
